# Supplementary material for: The History of Slavs Inferred from Complete Mitochondrial Genome Sequences
Source: PLoS One. 2013 Jan 14;8(1):e54360. doi: 10.1371/journal.pone.0054360 (PMC3544712; doi:10.1371/journal.pone.0054360)
Supplement: Table S1 — List of mtDNA haplotypes retrieved from GenBank. (XLS) [file pone.0054360.s003.xls]

## Sheet: Arkusz1
Table S1. List of mtDNA haplotypes (complete sequences) retrieved from GenBank
	GenBank ID	Sequence ID	Ethnic origin	References
Figure S1	AF346974	AF346974	Crimean Tatar	[1]
	AF346975	AF346975	Dutch	[1]
	AY339404	AY339404	Finn	[2]
	AY339431	AY339431	Finn	[2]
	AY495165	AY495165	European of unknown origin	[3]
	AY495166	AY495166	European of unknown origin	[3]
	AY495167	AY495167	European of unknown origin	[3]
	AY495168	AY495168	European of unknown origin	[3]
	AY495169	AY495169	European of unknown origin	[3]
	AY495170	AY495170	European of unknown origin	[3]
	AY495171	AY495171	European of unknown origin	[3]
	AY495172	AY495172	European of unknown origin	[3]
	AY495173	AY495173	European of unknown origin	[3]
	AY495174	AY495174	European of unknown origin	[3]
	AY495175	AY495175	European of unknown origin	[3]
	AY495176	AY495176	European of unknown origin	[3]
	AY738952	AY738952	Italian	[4]
	AY738953	AY738953	Italian	[4]
	AY738954	AY738954	Italian	[4]
	EF418607	EF418607	Unknown	[5]
	EF420250	EF420250	Unknown	[5]
	EU294323	EU294323	Unknown	[5]
	FJ966912	FJ966912	Unknown	[5]
	EU372627	EU372627	English	[5]
	FJ794473	FJ794473	English	[5]
	EU677750	EU677750	German	[5]
	GQ334692	GQ334692	Unknown	[5]
	HQ659693	HQ659693	Polish	[5]
	HQ661100	HQ661100	Unknown	[5]
	HQ661871	HQ661871	Prussian	[5]
	HQ663878	HQ663878	Danish	[5]
	HQ674629	HQ674629	Italian	[5]
	HQ677908	HQ677908	Unknown	[5]
	HQ700378	HQ700378	Irish	[5]
	HQ864470	HQ864470	Irish	[5]
	JN008723	JN008723	English	[5]
	HM027912	HM027912	Russian	[5]
	HM636849	HM636849	American	[5]
	HQ645111	HQ645111	English	[5]
	HQ663853	HQ663853	Jewish	[5]
	HQ677712	HQ677712	Georgian	[5]
	HQ709100	HQ709100	Unknown	[5]
	HQ850865	HQ850865	French	[5]
	HQ877768	HQ877768	Armenian	[5]
	JF790201	JF790201	Ashkenazi Jewish	[5]
	JF795326	JF795326	Romanian	[5]
	JN646689	JN646689	Polish	[5]
	EU597568	EU597568	Orcadian	[6]
	EU597579	EU597579	Orcadian	[6]
	EU600354	EU600354	Druze	[7]
	FJ236978	FJ236978	Jordanian	[8]
	FJ460545	FJ460545	Tunisian	[9]
	GQ983055	GQ983055	Italian	[10]
	GQ983056	GQ983056	Italian	[10]
	GQ983057	GQ983057	Italian	[10]
	GQ983058	GQ983058	Italian	[10]
	GQ983059	GQ983059	Italian	[10]
	GQ983060	GQ983060	Italian	[10]
	GQ983061	GQ983061	Italian	[10]
	GQ983062	GQ983062	Italian	[10]
	GQ983063	GQ983063	Italian	[10]
	GQ983064	GQ983064	Italian	[10]
	GQ983065	GQ983065	Italian	[10]
	GQ983066	GQ983066	Italian	[10]
	GQ983067	GQ983067	Italian	[10]
	GQ983068	GQ983068	Italian	[10]
	GQ983069	GQ983069	Italian	[10]
	GQ983070	GQ983070	Italian	[10]
	GQ983071	GQ983071	Italian	[10]
	GQ983072	GQ983072	Italian	[10]
	GQ983073	GQ983073	Italian	[10]
	GQ983074	GQ983074	Italian	[10]
	GQ983075	GQ983075	Italian	[10]
	GQ983076	GQ983076	Italian	[10]
	GQ983077	GQ983077	Italian	[10]
	GQ983079	GQ983079	Italian	[10]
	GQ983080	GQ983080	Italian	[10]
	GQ983081	GQ983081	Italian	[10]
	GQ983082	GQ983082	Italian	[10]
	GQ983083	GQ983083	Italian	[10]
	GQ983084	GQ983084	Italian	[10]
	GQ983085	GQ983085	Italian	[10]
	GQ983086	GQ983086	Italian	[10]
	GQ983087	GQ983087	Italian	[10]
	GQ983088	GQ983088	Italian	[10]
	GQ983089	GQ983089	Italian	[10]
	GQ983091	GQ983091	Italian	[10]
	GQ983092	GQ983092	Italian	[10]
	GQ983093	GQ983093	Italian	[10]
	GQ983094	GQ983094	Italian	[10]
	GQ983095	GQ983095	Italian	[10]
	GQ983096	GQ983096	Italian	[10]
	GQ983097	GQ983097	Italian	[10]
	GQ983098	GQ983098	Italian	[10]
	GQ983099	GQ983099	Italian	[10]
	GQ983100	GQ983100	Italian	[10]
	GQ983102	GQ983102	Italian	[10]
	GQ983103	GQ983103	Italian	[10]
	GQ983104	GQ983104	Italian	[10]
	GQ983105	GQ983105	Italian	[10]
	GQ983106	GQ983106	Italian	[10]
	GQ983107	GQ983107	Italian	[10]
	GQ983108	GQ983108	Italian	[10]
	GQ983109	GQ983109	Italian	[10]
	GQ983110	GQ983110	Italian	[10]
	GU123017	GU123017	Tatar	[11]
		Howell	European of unknown origin	[12]
	EU915472	EU915472	Italian	[13]
	FJ384434	FJ384434	European of unknown origin	[14]
	FJ384433	FJ384433	European of unknown origin	[14]
	GU592024	GU592024	Austrian	[15]
	GU592039	GU592039	Austrian	[15]
	GU592043	GU592043	Austrian	[15]
	GU592028	GU592028	European of unknown origin	[15]
	HM103356	HM103356	European of unknown origin	[16]
	JQ324545	JQ324545	Basque	[17]
	JQ324596	JQ324596	Basque	[17]
	JQ324661	JQ324661	Basque	[17]
	JQ324706	JQ324706	Basque	[17]
	JQ324775	JQ324775	Basque	[17]
	JQ324861	JQ324861	Basque	[17]
	JQ324526	JQ324526	Basque	[17]
	JQ324549	JQ324549	Basque	[17]
	JQ324663	JQ324663	Basque	[17]
	JQ324693	JQ324693	Basque	[17]
	JQ324724	JQ324724	Basque	[17]
	JQ324725	JQ324725	Basque	[17]
	JQ324869	JQ324869	Basque	[17]
	JQ324900	JQ324900	Basque	[17]
	JQ324925	JQ324925	Basque	[17]
	JQ701896	JQ701896	European of unknown origin	[18]
	JQ702083	JQ702083	European of unknown origin	[18]
	JQ702345	JQ702345	European of unknown origin	[18]
	JQ702402	JQ702402	European of unknown origin	[18]
	JQ702502	JQ702502	European of unknown origin	[18]
	JQ702571	JQ702571	European of unknown origin	[18]
	JQ702583	JQ702583	European of unknown origin	[18]
	JQ702653	JQ702653	European of unknown origin	[18]
	JQ702895	JQ702895	European of unknown origin	[18]
	JQ703228	JQ703228	European of unknown origin	[18]
	JQ703257	JQ703257	European of unknown origin	[18]
	JQ703266	JQ703266	European of unknown origin	[18]
	JQ703278	JQ703278	European of unknown origin	[18]
	JQ703405	JQ703405	European of unknown origin	[18]
	JQ703494	JQ703494	European of unknown origin	[18]
	JQ703498	JQ703498	European of unknown origin	[18]
	JQ703513	JQ703513	European of unknown origin	[18]
	JQ703547	JQ703547	European of unknown origin	[18]
	JQ703620	JQ703620	European of unknown origin	[18]
	JQ703627	JQ703627	European of unknown origin	[18]
	JQ703632	JQ703632	European of unknown origin	[18]
	JQ703731	JQ703731	European of unknown origin	[18]
	JQ703800	JQ703800	European of unknown origin	[18]
	JQ703820	JQ703820	European of unknown origin	[18]
	JQ703824	JQ703824	European of unknown origin	[18]
	JQ704060	JQ704060	European of unknown origin	[18]
	JQ704237	JQ704237	European of unknown origin	[18]
	JQ704246	JQ704246	European of unknown origin	[18]
	JQ704264	JQ704264	European of unknown origin	[18]
	JQ704324	JQ704324	European of unknown origin	[18]
	JQ704341	JQ704341	European of unknown origin	[18]
	JQ704372	JQ704372	European of unknown origin	[18]
	JQ704386	JQ704386	European of unknown origin	[18]
	JQ704396	JQ704396	European of unknown origin	[18]
	JQ704415	JQ704415	European of unknown origin	[18]
	JQ704498	JQ704498	European of unknown origin	[18]
	JQ704603	JQ704603	European of unknown origin	[18]
	JQ704706	JQ704706	European of unknown origin	[18]
	JQ704716	JQ704716	European of unknown origin	[18]
	JQ704730	JQ704730	European of unknown origin	[18]
	JQ704885	JQ704885	European of unknown origin	[18]
	JQ704886	JQ704886	European of unknown origin	[18]
	JQ705035	JQ705035	European of unknown origin	[18]
	JQ705412	JQ705412	European of unknown origin	[18]
	JQ705415	JQ705415	European of unknown origin	[18]
	JQ705511	JQ705511	European of unknown origin	[18]
	JQ705569	JQ705569	European of unknown origin	[18]
	JQ705748	JQ705748	European of unknown origin	[18]
	JQ705767	JQ705767	European of unknown origin	[18]
	JQ705790	JQ705790	European of unknown origin	[18]
	JQ705812	JQ705812	European of unknown origin	[18]
	JQ705824	JQ705824	European of unknown origin	[18]
	JQ705998	JQ705998	European of unknown origin	[18]
	JQ701865	JQ701865	European of unknown origin	[18]
	JQ701875	JQ701875	European of unknown origin	[18]
	JQ701882	JQ701882	European of unknown origin	[18]
	JQ701933	JQ701933	European of unknown origin	[18]
	JQ701941	JQ701941	European of unknown origin	[18]
	JQ701949	JQ701949	European of unknown origin	[18]
	JQ701974	JQ701974	European of unknown origin	[18]
	JQ702019	JQ702019	European of unknown origin	[18]
	JQ702128	JQ702128	European of unknown origin	[18]
	JQ702151	JQ702151	European of unknown origin	[18]
	JQ702156	JQ702156	European of unknown origin	[18]
	JQ702233	JQ702233	European of unknown origin	[18]
	JQ702260	JQ702260	European of unknown origin	[18]
	JQ702301	JQ702301	European of unknown origin	[18]
	JQ702317	JQ702317	European of unknown origin	[18]
	JQ702412	JQ702412	European of unknown origin	[18]
	JQ702463	JQ702463	European of unknown origin	[18]
	JQ702489	JQ702489	European of unknown origin	[18]
	JQ702550	JQ702550	European of unknown origin	[18]
	JQ702614	JQ702614	European of unknown origin	[18]
	JQ702615	JQ702615	European of unknown origin	[18]
	JQ702656	JQ702656	European of unknown origin	[18]
	JQ702670	JQ702670	European of unknown origin	[18]
	JQ702892	JQ702892	European of unknown origin	[18]
	JQ702946	JQ702946	European of unknown origin	[18]
	JQ702998	JQ702998	European of unknown origin	[18]
	JQ703057	JQ703057	European of unknown origin	[18]
	JQ703101	JQ703101	European of unknown origin	[18]
	JQ703105	JQ703105	European of unknown origin	[18]
	JQ703110	JQ703110	European of unknown origin	[18]
	JQ703150	JQ703150	European of unknown origin	[18]
	JQ703152	JQ703152	European of unknown origin	[18]
	JQ703186	JQ703186	European of unknown origin	[18]
	JQ703236	JQ703236	European of unknown origin	[18]
	JQ703241	JQ703241	European of unknown origin	[18]
	JQ703269	JQ703269	European of unknown origin	[18]
	JQ703276	JQ703276	European of unknown origin	[18]
	JQ703302	JQ703302	European of unknown origin	[18]
	JQ703307	JQ703307	European of unknown origin	[18]
	JQ703326	JQ703326	European of unknown origin	[18]
	JQ703389	JQ703389	European of unknown origin	[18]
	JQ703394	JQ703394	European of unknown origin	[18]
	JQ703447	JQ703447	European of unknown origin	[18]
	JQ703468	JQ703468	European of unknown origin	[18]
	JQ703550	JQ703550	European of unknown origin	[18]
	JQ703577	JQ703577	European of unknown origin	[18]
	JQ703643	JQ703643	European of unknown origin	[18]
	JQ703644	JQ703644	European of unknown origin	[18]
	JQ703738	JQ703738	European of unknown origin	[18]
	JQ703791	JQ703791	European of unknown origin	[18]
	JQ703799	JQ703799	European of unknown origin	[18]
	JQ703846	JQ703846	European of unknown origin	[18]
	JQ703921	JQ703921	European of unknown origin	[18]
	JQ704012	JQ704012	European of unknown origin	[18]
	JQ704059	JQ704059	European of unknown origin	[18]
	JQ704071	JQ704071	European of unknown origin	[18]
	JQ704146	JQ704146	European of unknown origin	[18]
	JQ704148	JQ704148	European of unknown origin	[18]
	JQ704150	JQ704150	European of unknown origin	[18]
	JQ704225	JQ704225	European of unknown origin	[18]
	JQ704233	JQ704233	European of unknown origin	[18]
	JQ704238	JQ704238	European of unknown origin	[18]
	JQ704248	JQ704248	European of unknown origin	[18]
	JQ704272	JQ704272	European of unknown origin	[18]
	JQ704278	JQ704278	European of unknown origin	[18]
	JQ704308	JQ704308	European of unknown origin	[18]
	JQ704332	JQ704332	European of unknown origin	[18]
	JQ704347	JQ704347	European of unknown origin	[18]
	JQ704359	JQ704359	European of unknown origin	[18]
	JQ704397	JQ704397	European of unknown origin	[18]
	JQ704399	JQ704399	European of unknown origin	[18]
	JQ704401	JQ704401	European of unknown origin	[18]
	JQ704423	JQ704423	European of unknown origin	[18]
	JQ704437	JQ704437	European of unknown origin	[18]
	JQ704442	JQ704442	European of unknown origin	[18]
	JQ704467	JQ704467	European of unknown origin	[18]
	JQ704650	JQ704650	European of unknown origin	[18]
	JQ704652	JQ704652	European of unknown origin	[18]
	JQ704750	JQ704750	European of unknown origin	[18]
	JQ704766	JQ704766	European of unknown origin	[18]
	JQ704863	JQ704863	European of unknown origin	[18]
	JQ705237	JQ705237	European of unknown origin	[18]
	JQ705241	JQ705241	European of unknown origin	[18]
	JQ705315	JQ705315	European of unknown origin	[18]
	JQ705431	JQ705431	European of unknown origin	[18]
	JQ705438	JQ705438	European of unknown origin	[18]
	JQ705453	JQ705453	European of unknown origin	[18]
	JQ705507	JQ705507	European of unknown origin	[18]
	JQ705582	JQ705582	European of unknown origin	[18]
	JQ705762	JQ705762	European of unknown origin	[18]
	JQ705787	JQ705787	European of unknown origin	[18]
	JQ705863	JQ705863	European of unknown origin	[18]
	JQ705971	JQ705971	European of unknown origin	[18]
	AY195747	AY195747	Unknown	[19]
	AY339430	AY339430	Finn	[20]
	AY339432	AY339432	Finn	[20]
	EF660940	EF660940	Italian	[21]
	EF660986	EF660986	Italian	[21]
	EF661003	EF661003	Italian	[21]
	HM625680	HM625680	Austrian	[22]
	HM852842	HM852842	Iranian	[23]
	HQ287894	HQ287894	English	[24]
	HQ287895	HQ287895	Irish	[24]
	HQ384189	HQ384189	Spanish	[25]
	HQ384190	HQ384190	Spanish	[25]
Figure S2	AY738955	AY738955	Italian	[4]
	AY738956	AY738956	Italian	[4]
	EU919746	EU919746	Unknown	[5]
	EU154342	EU154342	Irish	[5]
	EU256375	EU256375	Unknown	[5]
	FJ652065	FJ652065	Norwegian	[5]
	JN601518	JN601518	German	[5]
	GQ168843	GQ168843	Unknown	[5]
	FJ713600	FJ713600	English	[5]
	GQ168843	GQ168843	American	[5]
	GU004258	GU004258	Spanish	[5]
	GU390313	GU390313	Hungarian Jewish	[5]
	HM015668	HM015668	Ashkenazi Jewish	[5]
	HM019517	HM019517	Unknown	[5]
	HM124476	HM124476	Unknown	[5]
	HQ405756	HQ405756	Russian (Moskovskaya oblast: Taldom region)	[5]
	HQ658481	HQ658481	English	[5]
	HQ658736	HQ658736	Unknown	[5]
	HQ659687	HQ659687	Unknown	[5]
	JQ657730	JQ657730	Czech	[5]
	EU600329	EU600329	Druze	[7]
	GU123006	Tm34	Tatar	[11]
	GU123020	Tm57	Tatar	[11]
	JQ324568	JQ324568	Basque	[17]
	JQ324601	JQ324601	Basque	[17]
	JQ324623	JQ324623	Basque	[17]
	JQ324676	JQ324676	Basque	[17]
	JQ324730	JQ324730	Basque	[17]
	JQ324762	JQ324762	Basque	[17]
	JQ324811	JQ324811	Basque	[17]
	JQ324845	JQ324845	Basque	[17]
	JQ324891	JQ324891	Basque	[17]
	JQ324541	JQ324541	Basque	[17]
	JQ701955	JQ701955	European of unknown origin	[18]
	JQ701925	JQ701925	European of unknown origin	[18]
	JQ702509	JQ702509	European of unknown origin	[18]
	JQ702107	JQ702107	European of unknown origin	[18]
	JQ704333	JQ704333	European of unknown origin	[18]
	JQ703345	JQ703345	European of unknown origin	[18]
	JQ701963	JQ701963	European of unknown origin	[18]
	JQ703028	JQ703028	European of unknown origin	[18]
	JQ703205	JQ703205	European of unknown origin	[18]
	JQ704472	JQ704472	European of unknown origin	[18]
	JQ704195	JQ704195	European of unknown origin	[18]
	JQ702189	JQ702189	European of unknown origin	[18]
	JQ705660	JQ705660	European of unknown origin	[18]
	JQ704469	JQ704469	European of unknown origin	[18]
	JQ704592	JQ704592	European of unknown origin	[18]
	JQ704495	JQ704495	European of unknown origin	[18]
	JQ705873	JQ705873	European of unknown origin	[18]
	JQ704376	JQ704376	European of unknown origin	[18]
	JQ703391	JQ703391	European of unknown origin	[18]
	JQ704239	JQ704239	European of unknown origin	[18]
	JQ705858	JQ705858	European of unknown origin	[18]
	JQ704651	JQ704651	European of unknown origin	[18]
	JQ702830	JQ702830	European of unknown origin	[18]
	JQ704543	JQ704543	European of unknown origin	[18]
	JQ703321	JQ703321	European of unknown origin	[18]
	JQ704270	JQ704270	European of unknown origin	[18]
	JQ703232	JQ703232	European of unknown origin	[18]
	JQ704515	JQ704515	European of unknown origin	[18]
	JQ704208	JQ704208	European of unknown origin	[18]
	JQ702000	JQ702000	European of unknown origin	[18]
	JQ702090	JQ702090	European of unknown origin	[18]
	JQ702212	JQ702212	European of unknown origin	[18]
	JQ702214	JQ702214	European of unknown origin	[18]
	JQ702265	JQ702265	European of unknown origin	[18]
	JQ702285	JQ702285	European of unknown origin	[18]
	JQ702318	JQ702318	European of unknown origin	[18]
	JQ702319	JQ702319	European of unknown origin	[18]
	JQ702330	JQ702330	European of unknown origin	[18]
	JQ702385	JQ702385	European of unknown origin	[18]
	JQ702418	JQ702418	European of unknown origin	[18]
	JQ702465	JQ702465	European of unknown origin	[18]
	JQ702475	JQ702475	European of unknown origin	[18]
	JQ702506	JQ702506	European of unknown origin	[18]
	JQ702606	JQ702606	European of unknown origin	[18]
	JQ702708	JQ702708	European of unknown origin	[18]
	JQ702725	JQ702725	European of unknown origin	[18]
	JQ702813	JQ702813	European of unknown origin	[18]
	JQ702822	JQ702822	European of unknown origin	[18]
	JQ703061	JQ703061	European of unknown origin	[18]
	JQ703103	JQ703103	European of unknown origin	[18]
	JQ703161	JQ703161	European of unknown origin	[18]
	JQ703271	JQ703271	European of unknown origin	[18]
	JQ703314	JQ703314	European of unknown origin	[18]
	JQ703353	JQ703353	European of unknown origin	[18]
	JQ703404	JQ703404	European of unknown origin	[18]
	JQ703432	JQ703432	European of unknown origin	[18]
	JQ703507	JQ703507	European of unknown origin	[18]
	JQ703519	JQ703519	European of unknown origin	[18]
	JQ703559	JQ703559	European of unknown origin	[18]
	JQ703622	JQ703622	European of unknown origin	[18]
	JQ703732	JQ703732	European of unknown origin	[18]
	JQ703813	JQ703813	European of unknown origin	[18]
	JQ704116	JQ704116	European of unknown origin	[18]
	JQ704127	JQ704127	European of unknown origin	[18]
	JQ704145	JQ704145	European of unknown origin	[18]
	JQ704167	JQ704167	European of unknown origin	[18]
	JQ704174	JQ704174	European of unknown origin	[18]
	JQ704179	JQ704179	European of unknown origin	[18]
	JQ704296	JQ704296	European of unknown origin	[18]
	JQ704299	JQ704299	European of unknown origin	[18]
	JQ704304	JQ704304	European of unknown origin	[18]
	JQ704339	JQ704339	European of unknown origin	[18]
	JQ704367	JQ704367	European of unknown origin	[18]
	JQ704380	JQ704380	European of unknown origin	[18]
	JQ704390	JQ704390	European of unknown origin	[18]
	JQ704393	JQ704393	European of unknown origin	[18]
	JQ704417	JQ704417	European of unknown origin	[18]
	JQ704453	JQ704453	European of unknown origin	[18]
	JQ704458	JQ704458	European of unknown origin	[18]
	JQ704474	JQ704474	European of unknown origin	[18]
	JQ704476	JQ704476	European of unknown origin	[18]
	JQ704489	JQ704489	European of unknown origin	[18]
	JQ704479	JQ704479	European of unknown origin	[18]
	JQ704512	JQ704512	European of unknown origin	[18]
	JQ704546	JQ704546	European of unknown origin	[18]
	JQ704608	JQ704608	European of unknown origin	[18]
	JQ704614	JQ704614	European of unknown origin	[18]
	JQ704621	JQ704621	European of unknown origin	[18]
	JQ704651	JQ704651	European of unknown origin	[18]
	JQ704653	JQ704653	European of unknown origin	[18]
	JQ704793	JQ704793	European of unknown origin	[18]
	JQ704848	JQ704848	European of unknown origin	[18]
	JQ704889	JQ704889	European of unknown origin	[18]
	JQ704910	JQ704910	European of unknown origin	[18]
	JQ705088	JQ705088	European of unknown origin	[18]
	JQ705188	JQ705188	European of unknown origin	[18]
	JQ705206	JQ705206	European of unknown origin	[18]
	JQ705325	JQ705325	European of unknown origin	[18]
	JQ705402	JQ705402	European of unknown origin	[18]
	JQ705440	JQ705440	European of unknown origin	[18]
	JQ705551	JQ705551	European of unknown origin	[18]
	JQ705592	JQ705592	European of unknown origin	[18]
	JQ705603	JQ705603	European of unknown origin	[18]
	JQ705659	JQ705659	European of unknown origin	[18]
	JQ705719	JQ705719	European of unknown origin	[18]
	JQ705730	JQ705730	European of unknown origin	[18]
	JQ763435	JQ763435	European of unknown origin	[18]
	JQ701979	JQ701979	European of unknown origin	[18]
	HQ730608	HQ730608	European of unknown origin	[18]
	FJ348203	FJ348203	South Tyrolean	[26]
		Howell (55=092H)	European of unknown origin	[27]
	HM765475	HM765475	Italian	[28]
	AM263177	#71	North Ossetian	[29]
	DQ112749	DQ112749	Saudi Arabian	[30]
	EF556185	EF556185	Unknown	[31]
	EF556178	EF556178	Unknown	[31]
Figure 2	EF153797	Br_618	Buryat	[32]
	AY519486	Ket 33A1	Ket	[33]
	EU482363	Kor 35	Koryak	[34]
	EU482364	Kor 58	Koryak	[34]
Figure 3	FJ743691	FTDNA_FJ743691	Unknown	[5]
	JN315676	FTDNA_JN315676	Russian	[5]
	GQ853199	FTDNA_GQ853199	Caucasian of unknown origin	[5]
	EU523127	FTDNA_EU523127	Unknown	[5]
	JQ705782	E_9159	European of unknown origin	[18]
	JQ705827	E_9308	European of unknown origin	[18]
	JQ705161	E_7260	European of unknown origin	[18]
	JQ702321	E_12	European of unknown origin	[18]
	FJ383635	H_46	Indian (Wanchoo)	[35]
	FJ383600	H_50	Indian (Lachungpa)	[35]
	FJ383597	H_61	Indian (Lachungpa)	[35]
	FJ383648	H_67	Indian (Lepcha)	[35]
	FJ383639	H_105	Indian (Wanchoo)	[35]
	FJ951605	SER_37_08	Polish	[36]
	FJ951606	SER_162_06	Polish	[36]
	FJ951452	B_96	Polish	[36]
	EU545470	Ch_III-12	Chinese	[37]
	AP008460	J_22	Japanese	[38]
	AP008536	J_100	Japanese	[38]
	AP008626	J_141	Japanese	[38]
	GU123045	Tm139	Russian	[39]
Figure 4	EU547188	FTDNA_Pl_1	Ashkenazic Jewish (Poland)	[5]
	EU200764	Tu67	Russian (Tula)	[40]
	EU092687	L321	Ashkenazic Jewish (Israel)	[41]
References:
1. Ingman M, Kaessmann H, Pääbo S, Gyllensten U (2000) Mitochondrial genome variation and the origin of modern humans. Nature 408: 708-713.
2. Moilanen JS, Finnila S, Majamaa K (2003) Lineage-specific selection in human mtDNA: lack of polymorphisms in a segment of MTND5 gene in haplogroup J. Mol Biol Evol. 20: 2132-2142.
3. Coble MD, Just RS, O'Callaghan JE, Letmanyi IH, Peterson CT,et al. (2004) Single nucleotide polymorphisms over the entire mtDNA genome that increase the power of forensic testing in Caucasians. Int J Legal Med 118: 137-146.
4. Achilli A, Rengo C, Magri C, Battaglia V, Olivieri A, et al. (2004) The molecular dissection of mtDNA haplogroup H confirms that the Franco-Cantabrian glacial refuge was a major source for the European gene pool. Am J Hum Genet. 75: 910-918.
5. Greenspan (2008) Family Tree DNA Project.
6. Hartmann A, Thieme M, Nanduri LK, Stempfl T, Moehle C,et al. (2009) Validation of microarray-based resequencing of 93 worldwide mitochondrial genomes. Hum Mutat. 30: 115-122.
7 .Shlush LI, Behar DM, Yudkovsky G, Templeton A, Hadid Y, et al. (2008) The Druze: a population genetic refugium of the Near East. PLoS One. 3: e2105.
8. Ennafaa H, Cabrera VM, Abu-Amero KK, González AM, Amor MB, et al. (2009) Mitochondrial DNA haplogroup H structure in North Africa. BMC Genet. 10: 8.
9. Costa MD, Cherni L, Fernandes V, Freitas F, Ammar El, et al. (2009) Data from complete mtDNA sequencing of Tunisian centenarians: testing haplogroup association and the "golden mean" to longevity. Mech Ageing Dev. 130: 222-226.
10. Santoro A, Balbi V, Balducci E, Pirazzini C, Rosini F, et al. (2010) Evidence for sub-haplogroup h5 of mitochondrial DNA as a risk factor for late onset Alzheimer's disease. PLoS One. 5: e12037.
11. Malyarchuk B, Derenko M, Denisova G, Kravtsova O (2010) Mitogenomic diversity in Tatars from the Volga-Ural region of Russia. Mol Biol Evol. 27: 2220-2226.
12. Howell N, Smejkal CB, Mackey DA, Chinnery PF, Turnbull DM, Herrnstadt C (2003) The pedigree rate of sequence divergence in the human mitochondrial genome: there is a difference between phylogenetic and pedigree rates. Am J Hum Genet. 2003 72: 659-6570.
13. Pello R, Martín MA, Carelli V, Nijtmans LG, Achilli A et al. (2008) Mitochondrial DNA background modulates the assembly kinetics of OXPHOS complexes in a cellular model of mitochondrial disease. Hum Mol Genet. 17: 4001-4011.
14. Fendt L, Zimmermann B, Daniaux M, Parson W (2009) Sequencing strategy for the whole mitochondrial genome resulting in high quality sequences. BMC Genomics. 10: 139.
15. Fendt L, Niederstätter H, Huber G, Zelger B, Dünser M et al. (2011) Accumulation of mutations over the entire mitochondrial genome of breast cancer cells obtained by tissue microdissection. Breast Cancer Res Treat. 128: 327-336.
16. Gómez-Durán A, Pacheu-Grau D, López-Gallardo E, Díez-Sánchez C, Montoya J, et al. (2010) Unmasking the causes of multifactorial disorders: OXPHOS differences between mitochondrial haplogroups. Hum Mol Genet. 19: 3343-3353.
17. Behar DM, Harmant C, Manry J, van Oven M, Haak W; Genographic Consortium. (2012) The Basque paradigm: genetic evidence of a maternal continuity in the Franco-Cantabrian region since pre-Neolithic times. Am J Hum Genet. 90: 486-493.
18. Behar DM, van Oven M, Rosset S, Metspalu M, Loogväli EL, et al. (2012) A "Copernican" reassessment of the human mitochondrial DNA tree from its root. Am J Hum Genet. 90: 675-684. .
19. Mishmar D, Ruiz-Pesini E, Golik P, Macaulay V, Clark AG, et al. (2003) Natural selection shaped regional mtDNA variation in humans. Proc Natl Acad Sci U S A. 100:171-6.
20. Moilanen JS, Finnila S, Majamaa K. (2003) Lineage-specific selection in human mtDNA: lack of polymorphisms in a segment of MTND5 gene in haplogroup J. Mol Biol Evol. 20:2132-42.
21. Gasparre G, Porcelli AM, Bonora E, Pennisi LF, Toller M, et al. (2007) Disruptive mitochondrial DNA mutations in complex I subunits are markers of oncocytic phenotype in thyroid tumors. Proc Natl Acad Sci U S A. 104:9001-6.
22. Kloss-Brandstätter A, Schäfer G, Erhart G, Hüttenhofer A, Coassin S,et al. (2010) Somatic mutations throughout the entire mitochondrial genome are associated with elevated PSA levels in prostate cancer patients. Am J Hum Genet. 87:802-12
23. Schönberg A, Theunert C, Li M, Stoneking M, Nasidze I. (2011) High-throughput sequencing of complete human mtDNA genomes from the Caucasus and West Asia: high diversity and demographic inferences. Eur J Hum Genet. 19:988-94.
24. Pope AM, Carr SM, Smith KN, Marshall HD. (2011) Mitogenomic and microsatellite variation in descendants of the founder population of Newfoundland: high genetic diversity in an historically isolated population. Genome. 54:110-9.
25. Gómez-Carballa A, Cerezo M, Balboa E, Heredia C, Castro-Feijóo L, et al. (2011) Evolutionary analyses of entire genomes do not support the association of mtDNA mutations with Ras/MAPK pathway syndromes. PLoS One. 6:e18348.
26. Pichler I, Fuchsberger C, Platzer C, Caliskan M, Marroni F, et al. (2010) Drawing the history of the Hutterite population on a genetic landscape: inference from Y-chromosome and mtDNA genotypes. Eur J Hum Genet 18:463-470.
27. Howell N, Oostra R-J, Bolhuis PA, Spruijt L, Clarke LA, et al. (2003) Sequence analysis of the mitochondrial genomes from Dutch pedigrees with Leber Hereditary Optic Neuropathy. Am J Hum Genet 72: 1460-1469.
28. Zaragoza MV, Fass J, Diegoli M, Lin D, Arbustini E. (2010) Mitochondrial DNA variant discovery and evaluation in human cardiomyopathies through next-generation sequencing. PLoS ONE 5:e12295.
29. Roostalu U, Kutuev I, Loogväli EL, Metspalu E, Tambets K, et al. (2007) Origin and expansion of haplogroup H, the dominant human mitochondrial DNA lineage in West Eurasia: the Near Eastern and Caucasian perspective. Mol Biol Evol. 24: 436-448.
30. Kivisild T, Shen P, Wall DP, Do B, Sung R, et al. (2005) The role of selection in the evolution of human mitochondrial genomes. Genetics. 172:373-87
31 Behar DM, Metspalu E, Kivisild T, Rosset S, Tzur S, et al. (2008) Counting the founders: the matrilineal genetic ancestry of the Jewish Diaspora. PLoS One. 3:e2062.
32. Derenko M, Malyarchuk B, Grzybowski T, Denisova G, Dambueva I, et al. (2007) Phylogeographic analysis of mitochondrial DNA in northern Asian populations. Am J Hum Genet. 81: 1025-1041.
33. Starikovskaya EB, Sukernik RI, Derbeneva OA, Volodko NV, Ruiz-Pesini E, Torroni A, Brown MD, Lott MT, Hosseini SH, Huoponen K, Wallace DC. (2005) Mitochondrial DNA diversity in indigenous populations of the southern extent of Siberia, and the origins of Native American haplogroups. Ann Hum Genet. 69: 67-89.
34. Volodko NV, Starikovskaya EB, Mazunin IO, Eltsov NP, Naidenko PV, et al. (2008) Mitochondrial genome diversity in arctic Siberians, with particular reference to the evolutionary history of Beringia and Pleistocenic peopling of the Americas. Am J Hum Genet. 82: 1084-1100.
35. Chandrasekar A, Kumar S, Sreenath J, Sarkar BN, Urade BP et al. (2009) Updating phylogeny of mitochondrial DNA macrohaplogroup m in India: dispersal of modern human in South Asian corridor. PLoS One. 4: e7447.
36. Derenko M, Malyarchuk B, Grzybowski T, Denisova G, Rogalla U, Perkova M, Dambueva I, Zakharov I. (2010) Origin and post-glacial dispersal of mitochondrial DNA haplogroups C and D in northern Asia. PLoS One. 5:e15214.
37. Wang HW, Jia X, Ji Y, Kong QP, Zhang Q, et al. (2008) Strikingly different penetrance of LHON in two Chinese families with primary mutation G11778A is independent of mtDNA haplogroup background and secondary mutation G13708A. Mutat Res. 643: 48-53.
38. Tanaka M, Cabrera VM, González AM, Larruga JM, Takeyasu T, et al. (2004) Mitochondrial genome variation in eastern Asia and the peopling of Japan. Genome Res. 14: 1832-1850.
39. Malyarchuk B, Derenko M, Denisova G, Kravtsova O. (2010) Mitogenomic diversity in Tatars from the Volga-Ural region of Russia. Mol Biol Evol. 27:2220-6.
40. Malyarchuk BA, Derenko M, Perkova M, Grzybowski T, Vanecek T, Lazur J (2008) Reconstructing the phylogeny of African mitochondrial DNA lineages in Slavs. Eur J Hum Genet. 16: 1091-1096.
41. Behar DM, Villems R, Soodyall H, Blue-Smith J, Pereira L, et al. (2008) The dawn of human matrilineal diversity. Am J Hum Genet. 82: 1130-1140.
